# Supplementary material for: Hydroxyurea inhibits ERAD-L independently of S-phase arrest in budding yeast
Source: bioRxiv or medRxiv preprint supplement (doi:10.1101/2023.01.22.525111), 2023-01-23
Supplement: Supplementary file [file media-1.pdf]

### Supplementary Table I

Yeast strains used in this study

| <b>Name</b> | <b>Description</b>                                                                                                          | <b>Source</b>    |
|-------------|-----------------------------------------------------------------------------------------------------------------------------|------------------|
| BY4741      | <i>MATa his3Δ1 leu2Δ0 met15Δ0 ura3Δ0</i>                                                                                    | Dr. S. Michaelis |
| E3Δhrd1     | <i>MATa his3Δ1 leu2Δ0 met15Δ0 ura3Δ0<br/>hrd1Δ::KanR</i>                                                                    | Open Biosystems  |
| E3Δhrd3     | <i>MATa his3Δ1 leu2Δ0 met15Δ0 ura3Δ0<br/>hrd3Δ::KanR</i>                                                                    | Open Biosystems  |
| E3Δyos9     | <i>MATa his3Δ1 leu2Δ0 met15Δ0 ura3Δ0<br/>yos9Δ::KanR</i>                                                                    | Open Biosystems  |
| E3Δder1     | <i>MATa his3Δ1 leu2Δ0 met15Δ0 ura3Δ0<br/>der1Δ::KanR</i>                                                                    | Open Biosystems  |
| KNY140      | <i>MATa ade2-1 ura3-1 his3-11,15 trp1-1 leu2-3,112<br/>can1-100 pdr5Δ::HPH pep4Δ::LEU2</i>                                  | (1)              |
| KNY220      | <i>MATa ade2-1 ura3-1 his3-11,15 trp1-1 leu2-3,112<br/>can1-100 pdr5Δ::HPH pep4Δ::LEU2 HRD1-<br/>3FLAG- KAN<sup>R</sup></i> | (1)              |

## Supplementary Table II

Plasmids used in this study

| Name     | Description                                                                                                                                                                                                            | Source     |
|----------|------------------------------------------------------------------------------------------------------------------------------------------------------------------------------------------------------------------------|------------|
| pKN12-22 | CPY*-3HA, <i>CEN/ARS</i> , <i>URA3</i><br>(CPY*: a soluble substrate due to the presence of a missense mutation in an otherwise vacuole-targeted protease)                                                             | (2)        |
| pSM70    | KHN-3HA, <i>CEN/ARS</i> , <i>URA3</i><br>(KHN: a heterologously expressed simian virus 5 hemagglutinin neuraminidase (HN) that is fused with the cleavable signal sequence from the yeast Kar2 (the ER luminal Hsp70)) | (3)        |
| pSM101   | KWW-3HA, <i>CEN/ARS</i> , <i>URA3</i><br>(KWW: a chimeric protein comprising KHN luminal domain/Wsc1 transmembrane domain/Wsc1 cytosolic domain)                                                                       | (4)        |
| pKN66    | Ste6*-3HA, <i>CEN/ARS</i> , <i>URA3</i><br>(Ste6*: a C-terminal truncated version of the a-factor transporter Ste6)                                                                                                    | (5)        |
| pKN515   | 3HA-Pca1, <i>CEN/ARS</i> , <i>URA3</i><br>(Pca1: a cadmium transporting P-type ATPase whose proteasome-dependent degradation is exclusively dependent on Doa10)                                                        | (6)        |
| pKN541   | 3HA-Pdr5*, <i>CEN/ARS</i> , <i>URA3</i><br>(Pdr5*: a 12 transmembrane protein that harbors misfolded lesions near these domains)                                                                                       | This study |
| pKN562   | 6myc-Hmg2, <i>CEN/ARS</i> , <i>URA3</i><br>(Hmg2: the yeast HMG-CoA reductase isozyme)                                                                                                                                 | This study |
| pJC104   | 4×UPRE (four copies of the unfolded protein response element)- <i>lacZ</i> , <i>2μ</i> , <i>URA3</i>                                                                                                                   | (7)        |

A plasmid encoding *3HA-PDR5\** (pKN541) was constructed as follows. The PCR reaction was performed using a plasmid pKN44 (8), which encodes *IHA-PDR5\**, as a template and using primers OKN2234 and OKN2235. The resulting linear fragment was transformed into Mach1 competent cell (Thermo Fisher Scientific). The circularized

plasmids were mini-prepped from the transformants and the DNA sequence was performed to verify that the single HA tag was replaced with triple HA tag.

A plasmid encoding 6myc-Hmg2 under the sequence of the *GPD* promoter (pKN562) was constructed as follows. The DNA fragment encoding the open reading frame of 6myc-Hmg2 was amplified by PCR from yeast strain expressing this protein (9) using primers OKN2273 and OKN2275. The resultant fragment was digested with *XbaI/XhoI* and inserted into the same sites of p416GPD (10).

### Supplementary Table III

Oligonucleotide primers used in this study

| Name    | Sequence                                                                                        |
|---------|-------------------------------------------------------------------------------------------------|
| OKN2234 | CCTTATGATGTCCCAGATTACGCAGGTTCTTATCCTTACGA<br>TGTACCAGACTACGCCGGTCCCGAGGCCAAGCTTAACAAT<br>AACG   |
| OKN2235 | CCTGCGTAATCTGGGACATCATAAGGGTAACCAGCATAAT<br>CAGGAACGTCATAAGGGTATGAACCCATTTTTGTCTAAAGT<br>CTTTCG |
| OKN2273 | ATATCCTCGAGCACCATGTAAACTACAAGAG                                                                 |
| OKN2275 | GCTGCTCTAGAATGTCACTTCCCTTAAAAACGATAG                                                            |

### Supplementary Table IV

Antibodies used in this study

| Antibody       | Company                                                                                                         | Identifier or reference |
|----------------|-----------------------------------------------------------------------------------------------------------------|-------------------------|
| $\alpha$ HA    | MEDICAL & BIOLOGICAL LABORATORIES                                                                               | #M180-3                 |
| $\alpha$ Pgk1  | abcam                                                                                                           | [22C5D8] (#ab113687)    |
| $\alpha$ Hrd1  | In house                                                                                                        | (1)                     |
| $\alpha$ Cdc48 | In house                                                                                                        | (1)                     |
| $\alpha$ Yos9  | In house                                                                                                        | (1)                     |
| $\alpha$ Der1  | In house                                                                                                        | (1)                     |
| $\alpha$ Hrd3  | Gift from Dr. Thomas Sommer and Dr. Ernst Jarosch (Max-Delbrück-Center for Molecular Medicine, Berlin, Germany) |                         |
| $\alpha$ Sic1  | Gift from Dr. Takumi Kamura (Nagoya University, Aichi, Japan)                                                   |                         |
| $\alpha$ Clb2  | Gift from Dr. Takumi Kamura (Nagoya University, Aichi, Japan)                                                   |                         |
| $\alpha$ myc   | Gift from Dr. Takumi Kamura (Nagoya University, Aichi, Japan)                                                   |                         |

1. Nakatsukasa, K., Brodsky, J. L., and Kamura, T. (2013) A stalled retrotranslocation complex reveals physical linkage between substrate recognition and proteasomal degradation during ER-associated degradation. *Mol Biol Cell* **24**, 1765-1775, S1761-1768
2. Bhamidipati, A., Denic, V., Quan, E. M., and Weissman, J. S. (2005) Exploration of the topological requirements of ERAD identifies Yos9p as a lectin sensor of misfolded glycoproteins in the ER lumen. *Molecular cell* **19**, 741-751
3. Vashist, S., Kim, W., Belden, W. J., Spear, E. D., Barlowe, C., and Ng, D. T. (2001) Distinct retrieval and retention mechanisms are required for the quality control of endoplasmic reticulum protein folding. *J Cell Biol* **155**, 355-368
4. Vashist, S., and Ng, D. T. (2004) Misfolded proteins are sorted by a sequential checkpoint mechanism of ER quality control. *J Cell Biol* **165**, 41-52
5. Nakatsukasa, K., and Kamura, T. (2016) Subcellular Fractionation Analysis of the Extraction of Ubiquitinated Polytopic Membrane Substrate during ER-Associated Degradation. *PloS one* **11**, e0148327
6. Adle, D. J., Wei, W., Smith, N., Bies, J. J., and Lee, J. (2009) Cadmium-mediated rescue from ER-associated degradation induces expression of its exporter. *Proceedings of the National Academy of Sciences of the United States of America* **106**, 10189-10194
7. Cox, J. S., and Walter, P. (1996) A novel mechanism for regulating activity of a transcription factor that controls the unfolded protein response. *Cell* **87**, 391-404
8. Nakatsukasa, K., Wigge, S., Takano, Y., Kawarasaki, T., Kamura, T., and Brodsky, J. L. (2022) A positive genetic selection for transmembrane domain mutations in HRD1 underscores the importance of Hrd1 complex integrity during ERAD. *Curr Genet* **68**, 227-242
9. Cronin, S. R., Khoury, A., Ferry, D. K., and Hampton, R. Y. (2000) Regulation of HMG-CoA reductase degradation requires the P-type ATPase Cod1p/Spf1p. *J Cell Biol* **148**, 915-924
10. Mumberg, D., Muller, R., and Funk, M. (1995) Yeast vectors for the controlled expression of heterologous proteins in different genetic backgrounds. *Gene* **156**, 119-122
