# Supplementary material for: Hydroxyurea inhibits ERAD-L independently of S-phase arrest in budding yeast
Source: bioRxiv or medRxiv preprint supplement (doi:10.1101/2023.01.22.525111), 2023-01-23
Supplement: Supplementary file [file media-2.pdf]

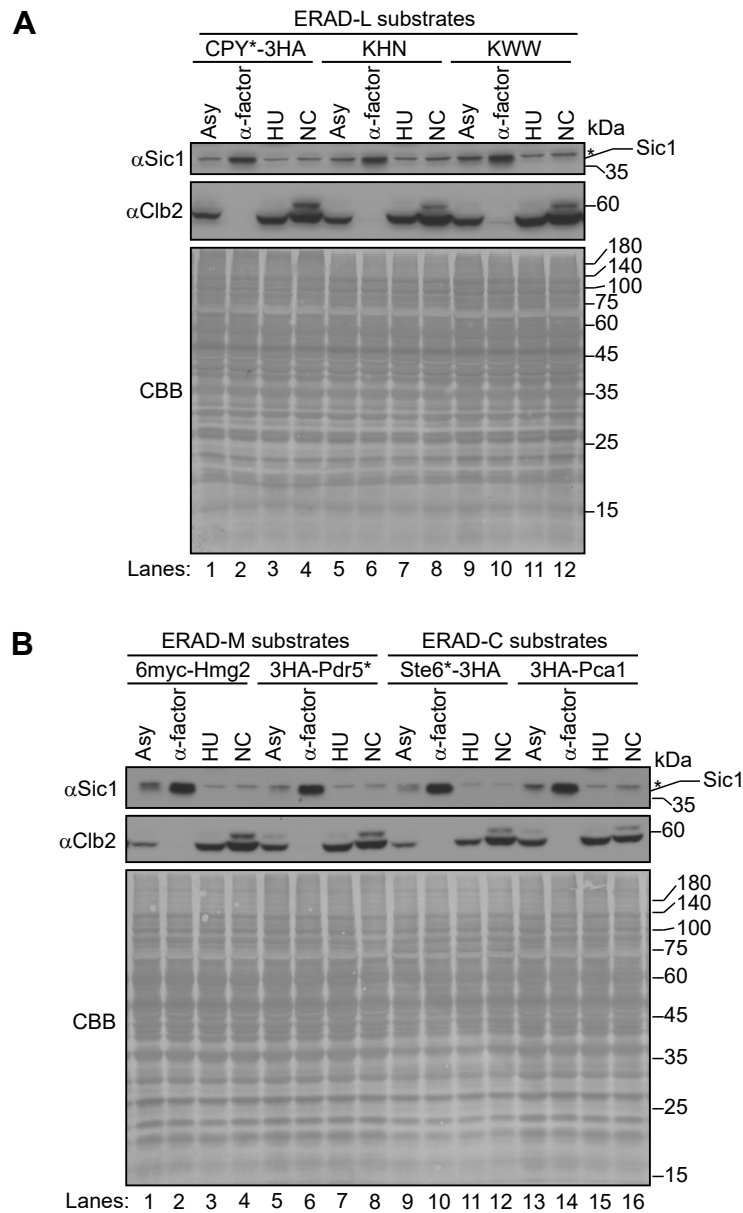

**Fig. S1: The levels of Sic1 and Clb2 in cells expressing ERAD-L, -M, or -C substrates synchronized at G1, S, or G2/M phase.**

(A-B) The levels of Sic1 and Clb2 in cells at time=0 of cycloheximide chase analysis in Fig. 1 and 2 were analyzed by western blotting. CBB staining of the membrane served as a loading control.
