# Supplementary material for: Hydroxyurea inhibits ERAD-L independently of S-phase arrest in budding yeast
Source: bioRxiv or medRxiv preprint supplement (doi:10.1101/2023.01.22.525111), 2023-01-23
Supplement: Supplementary file [file media-3.pdf]

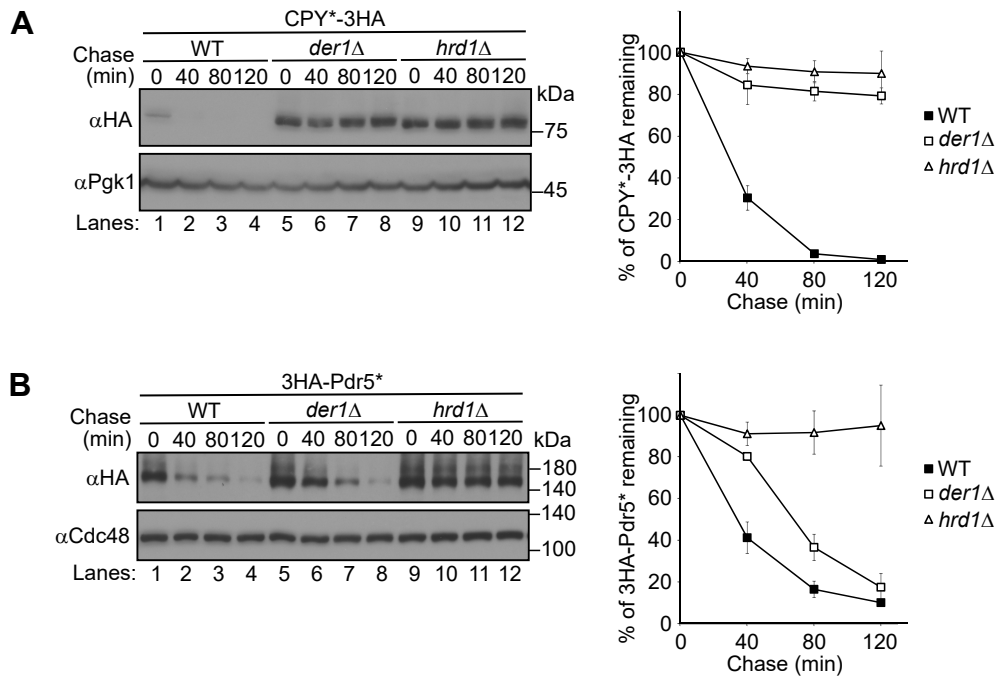

**Fig. S2: Der1 is dispensable for 3HA-Pdr5\* degradation**

(A-B) Cycloheximide chase analyses of CPY\*-3HA and 3HA-Pdr5\* in WT, *der1* $\Delta$ , and *hrd1* $\Delta$  cells were performed as in Fig.1B. Signals for each substrate were normalized to Pgk1 signals (A) or Cdc48 signals (B), respectively. The data represent the mean  $\pm$ SE of three independent experiments.
