# Supplementary material for: Hydroxyurea inhibits ERAD-L independently of S-phase arrest in budding yeast
Source: bioRxiv or medRxiv preprint supplement (doi:10.1101/2023.01.22.525111), 2023-01-23
Supplement: Supplementary file [file media-4.pdf]

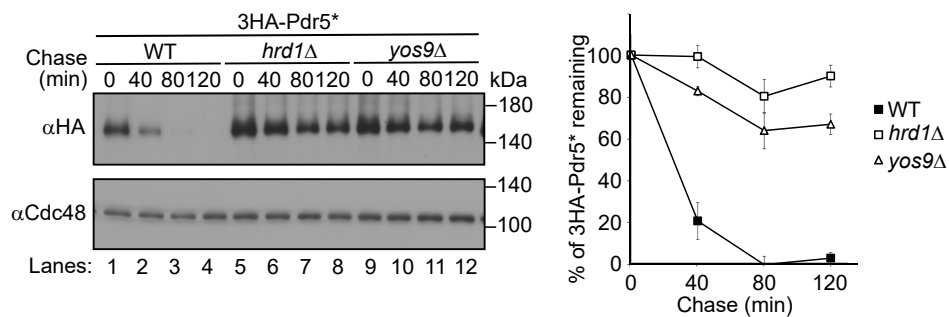

**Fig. S3: Yos9 is required for 3HA-Pdr5\* degradation**

Cycloheximide chase analysis of 3HA-Pdr5\* in WT, *hrd1Δ*, and *yos9Δ* cells was performed as in Fig.1B. Signals for each substrate were normalized to Cdc48 signals. The data represent the mean  $\pm$ SE of three independent experiments.
